# Supplementary material for: Behaviour Change Techniques in Weight Gain Prevention Interventions in Adults of Reproductive Age: Meta-Analysis and Meta-Regression
Source: MDPI journal article supplement (doi:10.3390/nu14010209), 2022-01-03
Supplement: s1 [file s1]

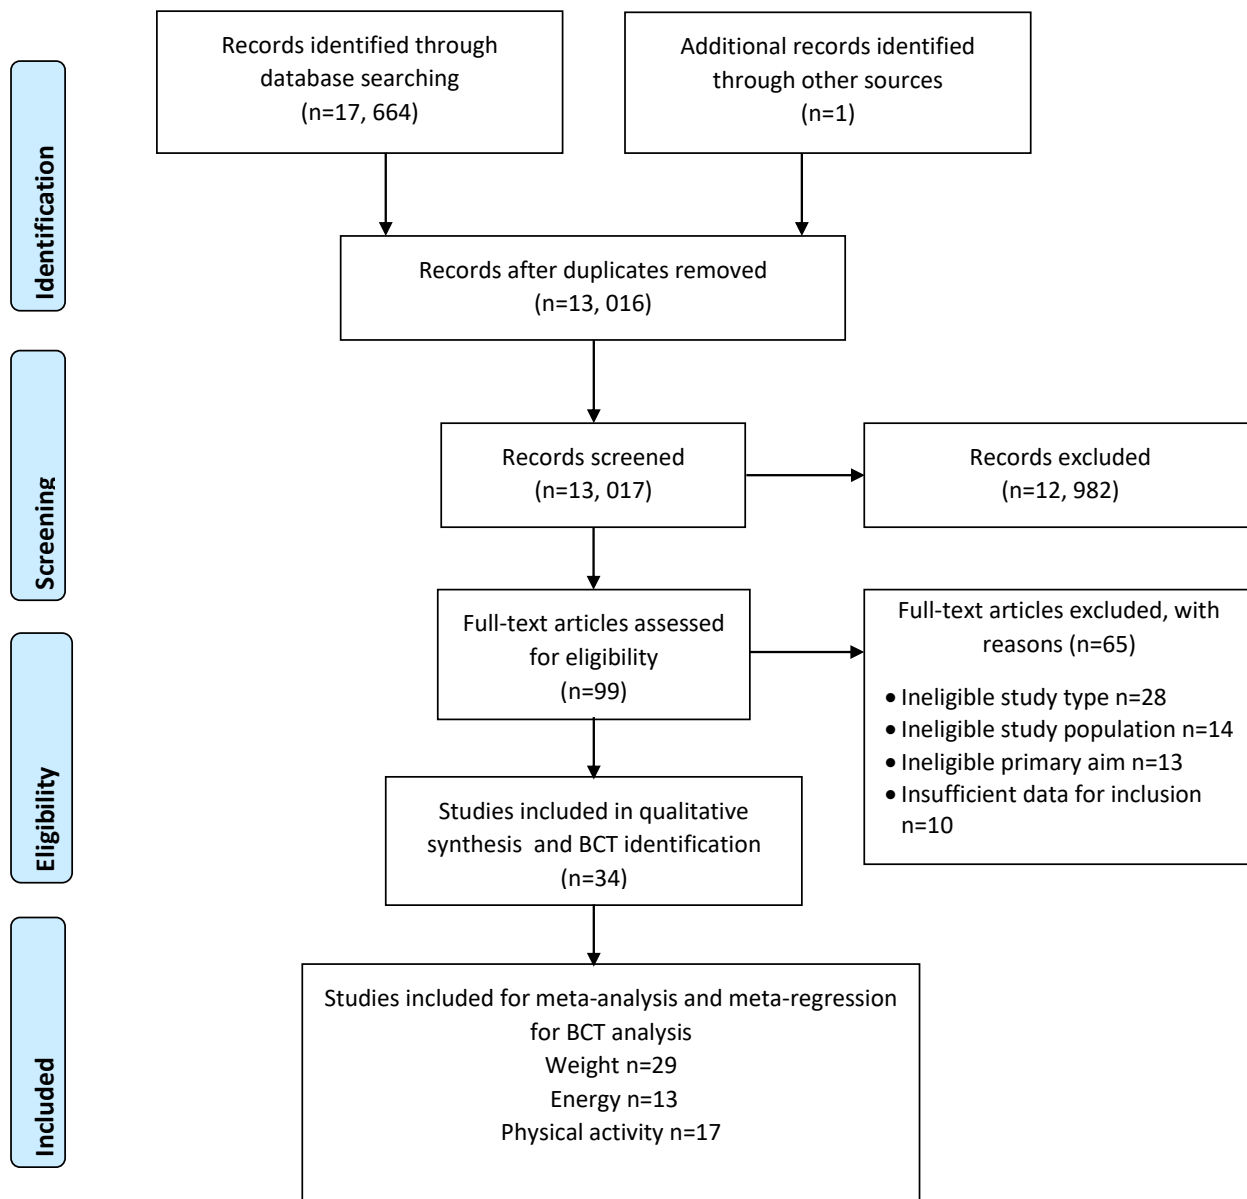

**Figure S1.** Preferred Reporting Items for Systematic Reviews and Meta-analysis flow diagram of included studies for meta-analysis and meta-regression.

BCT: Behaviour change techniques

Adapted from Martin et al., 2021 as a secondary analysis of a previous systematic review

**Table S1.** Intervention and comparator characteristics of included studies.

| First author, year, country,<br>N = number randomized       | Intervention                                                                                                                                                                                                                                                                                                       | Comparator                                                                      |
|-------------------------------------------------------------|--------------------------------------------------------------------------------------------------------------------------------------------------------------------------------------------------------------------------------------------------------------------------------------------------------------------|---------------------------------------------------------------------------------|
| Bennett et al. 2013;<br>Foley et al. 2012, USA<br>N=194     | Behavioural: Weekly interactive voice response calls, behavioural goals, annual gym membership.<br>Intensity: monthly calls<br>Facilitator: trained registered dietitian                                                                                                                                           | Newsletters: health topics (weight, nutrition, and PA excluded) sent bi-yearly  |
| Bertz <i>et al.</i> 2015, USA<br>N=167                      | Calorie titration method. Daily e-mailed graph of weight to avoid weight gain above target weight.                                                                                                                                                                                                                 | Emailed contact for weight 6 monthly, no feedback provided                      |
| Chang <i>et al.</i> 2017;<br>Chang et al. 2014 USA<br>N=612 | Behavioural: Theory-based culturally sensitive interactive DVDs and peer support group teleconferences<br>Intensity: Week 1-4 weekly, week 5-16, every other week. Teleconference (5x30 min sessions) Facilitator: Counselling (masters), with motivational interviewing                                           | Handouts: stress management, healthy eating, PA. DVD about food and home safety |
| Chang <i>et al.</i> 2010<br>USA, N=129                      | Behavioural: Theory-based culturally sensitive interactive DVDs and peer support group teleconferences<br>Intensity: Week 1-4 weekly, week 5-16, every other week. Teleconference (5x30 min sessions)<br>Facilitator: Counselling (masters), with motivational interviewing                                        | Nutrition education sessions: 6 months                                          |
| Cheung <i>et al.</i> 2017,<br>The Netherlands,<br>N=2423    | Behavioural: Web-based tailored behavioural change program: video or text format. Intensity- 6 weekly sessions X 15 mins                                                                                                                                                                                           | No intervention                                                                 |
| Donnelly <i>et al.</i><br>2003, USA<br>N= 131               | PA: Tailored supervised exercise program based on baseline maximal treadmill test updated 4 monthly. Intensity: Baseline (20 mins), 6 months (45 mins, 60% heart rate reserve at baseline to 75% at 6 months)<br>Facilitator: research assistant                                                                   | Usual PA and diet                                                               |
| Eiben <i>et al.</i> 2006,<br>Sweden<br>N=40                 | Behavioural: Tailored support package (PA, diet, weight), baseline counselling session, regular phone/email contact, occasional group sessions, special interest lectures, dietitian visits. Intensity: mailed package; fortnightly, follow up calls; monthly<br>Facilitator: Dietitian                            | Delayed treatment control group                                                 |
| Forster <i>et al.</i> 1988,<br>USA, N=219                   | Diet and PA: Newsletter containing weight control topics. Financial incentive for weight maintenance, 4 session weight management course (optional for weight gainers)<br>Intensity: monthly                                                                                                                       | No intervention                                                                 |
| Gow <i>et al.</i> 2010, USA<br>N=170                        | Behavioural: Three groups: Internet: online group sessions on diet, PA, behavioural change. Feedback: self-reported weight, e-mailed graph of change in weight with equivalent caloric change.<br>Combined: received both feedback and internet<br>Intensity: 6 weekly X 45 mins<br>Facilitator: trained clinician | No intervention                                                                 |

|                                             |                                                                                                                                                                                                                                                                                                                                                                                                                                                                                                                                                          |                                                                                                                                                                  |
|---------------------------------------------|----------------------------------------------------------------------------------------------------------------------------------------------------------------------------------------------------------------------------------------------------------------------------------------------------------------------------------------------------------------------------------------------------------------------------------------------------------------------------------------------------------------------------------------------------------|------------------------------------------------------------------------------------------------------------------------------------------------------------------|
| Hivert <i>et al.</i> 2007<br>Canada, N=115  | Behavioural: Group sessions: complications of weight gain, PA, diet<br>Intensity: Fortnightly for 2 months, then monthly ~45 min sessions<br>Facilitators: Endocrinology resident, PA graduate                                                                                                                                                                                                                                                                                                                                                           | No intervention                                                                                                                                                  |
| Jeffery <i>et al.</i> 1999<br>USA, N=1226   | Diet & PA/mixed: Healthy lifestyle/ behavioural change newsletter, return quiz, low cost activities<br>Two formats: Education only and Education plus incentive<br>Education plus incentive: financial incentive on returning quiz<br>Intensity: Monthly newsletter, 6 monthly activities                                                                                                                                                                                                                                                                | No intervention                                                                                                                                                  |
| Katterman <i>et al</i> 2014,<br>USA, N=58   | Behavioural: Face-to face group behavioural change sessions<br>Intensity: 8 sessions X 75 mins, sessions 4-5 weekly, then monthly<br>Facilitator: Graduate students with behavioural weight loss experience                                                                                                                                                                                                                                                                                                                                              | No intervention                                                                                                                                                  |
| Klem <i>et al.</i> 2000<br>USA, N=102       | Diet & PA/mixed: Healthy lifestyle course: behavioural skills with individual weight, calorie and fat goals<br>Delivery format: (Group or Correspondence)<br>Intensity: 10 weekly sessions                                                                                                                                                                                                                                                                                                                                                               | Lifestyle brochure                                                                                                                                               |
| LaRose <i>et al</i> 2019<br>USA, N= 609     | Diet & PA/mixed: Prescribed diet and exercise plans.<br>Small changes (SC): deficit of 100 kcal/day, steps increased to 2000/day<br>Large changes (LC): deficit of 500-1000 kcal/d and increasing moderate to vigorous PA to ≥250 mins/week, All participants daily self-weighing with feedback. Intensity: 10 × group sessions, weeks 1-8 weekly, weeks 9-16 monthly. 2× 4-weekly online refresher campaigns, monthly remote weight reporting, quarterly newsletter<br>Facilitator: health science (masters) and behavioural weight management training | 1 group session: weight gain, an overview of interventions. Participants chose an intervention.<br>Quarterly newsletter, monthly personalised feedback on weight |
| Leermakers <i>et al.</i><br>1998, USA, N=67 | Diet & PA/mixed: Prescriptive diet and exercise program with behavioural change strategies.<br>Clinic: supervised face to face group sessions<br>Home-based: correspondence with health coaching calls<br>Intensity: Clinic- 30 minute × 8 weekly sessions, then biweekly thereafter<br>Home-1 session, weekly newsletters for 8 weeks, weekly/biweekly telephone calls<br>Facilitator: Exercise physiologist, dietitian, behavioural therapist                                                                                                          | No intervention                                                                                                                                                  |
| Lemon <i>et al</i> 2014<br>USA, N=867       | Diet & PA/mixed: A multilevel program targeting the nutrition and physical activity environment, policies, and individual knowledge, attitudes and skills<br>Intensity: quarterly meetings<br>Facilitator: Coaches, school employees, employee advisory group                                                                                                                                                                                                                                                                                            | Employee resource book: healthy eating, PA and weight management, website access, weekly newsletter                                                              |
| Levine <i>et al.</i> 2007<br>USA, N= 284    | Diet & PA/mixed: Prescriptive diet and exercise program with behavioural change strategies. Clinic: Face to face group meetings<br>Correspondence: mailed format with returned homework assignments<br>Intensity: 15 meetings, biweekly for 2 months and bimonthly thereafter<br>Facilitator: trained nutritionists, behavioural interventionists                                                                                                                                                                                                        | Booklet: benefits of weight maintenance, low-fat eating, regular PA                                                                                              |

|                                                          |                                                                                                                                                                                                                                                    |                                                                                      |
|----------------------------------------------------------|----------------------------------------------------------------------------------------------------------------------------------------------------------------------------------------------------------------------------------------------------|--------------------------------------------------------------------------------------|
| Lombard <i>et al.</i><br>2010, Australia<br>N=250        | Behavioural: Face to face group sessions: simple health messages, behaviour change strategies. Pedometers: 8000-10,000 steps/d<br>Intensity: 4 × 1-hour group sessions. Monthly SMS. Motivational flyer x1<br>Facilitator: Dietitian               | One information session: population diet and PA.<br>Pedometer provided: no step goal |
| Lombard <i>et al.</i><br>2016, Australia<br>N= 649       | Behavioural: Face to face group session: simple health messages, behaviour change manual<br>Intensity: 1x 60 min group session, 1 x20 min phone call. Monthly SMS.<br>Facilitator: staff trained in motivational interviewing                      | Group session x1: women's health                                                     |
| Lombard <i>et al.</i> 2009,<br>Australia<br>N= 250       | Behavioural: Face to face group sessions: simple health messages, behaviour change strategies. Pedometer:8000-10,000 steps/d<br>Intensity: 4 × 1-hour group sessions, monthly SMS, calls or email<br>Facilitator: Dietitian                        | Group session x1: population diet and PA. Pedometer provided: no goal                |
| Lytle <i>et al.</i> 2017<br>USA, N=441                   | Behavioural: College course: diet, PA, stress management, sleep. Optional online, face-to-face or hybrid version. Access to social network website. Points for participation were provided and redeemed for wellness products                      | Health assessments and measurement, quarterly health information                     |
| Mason <i>et al.</i> 2018<br>UK, N=272                    | Behavioural: Self-monitor weight, reflect on weight trajectory; 10 tips for weight management, pictorial information of PA calorie equivalent of festive foods/beverages<br>Intensity: record weight min 2/weekly, ideally daily                   | Brief leaflet: healthy lifestyle                                                     |
| Matvienko <i>et al.</i> 2001,<br>USA, N=40               | Diet: College course: scientific principles related to weight gain prevention<br>Intensity: twice weekly comprising lectures and laboratory exercises ~50 mins each<br>Facilitator: lecturer                                                       | No intervention                                                                      |
| Medina <i>et al</i> 2016<br>USA, N=119                   | Diet & PA/mixed: Group sessions: prescriptive diet and exercise plans, behavioural change strategies<br>Intensity: 10 weekly group sessions ~90 mins each<br>Facilitator: clinical psychology student or trained undergraduate research assistants | Delayed treatment control group                                                      |
| Metzgar <i>et al.</i> 2016,<br>USA, N=87                 | Behavioural: Face to face group sessions: nutrition education, lifestyle behaviour<br>Intensity: 24 × 1 hr sessions. Months 1-4 weekly sessions, months 5-12 monthly sessions<br>Facilitator: Registered dietitian and counsellor                  | No intervention                                                                      |
| Middleton <i>et al</i> 2014,<br>USA, N=95                | Diet & PA/mixed: Face to face group sessions: prescribed diet and exercise plans, behavioural change strategies<br>Intensity: 5X weekly sessions<br>Facilitator: Clinical psychology student                                                       | Waist list control                                                                   |
| Nikolaou <i>et al</i><br>2015,<br>Scotland UK, N= 20,975 | Diet & exercise/mixed: Online healthy lifestyle courses: two treatments; "Not the ice-cream van (NTICV)": unwanted weight gain and obesity,                                                                                                        | No intervention                                                                      |

|                                                                   |                                                                                                                                                                                                                                                                                                                                                                                                                                                                                                                                                          |                                                                                                                                                                  |
|-------------------------------------------------------------------|----------------------------------------------------------------------------------------------------------------------------------------------------------------------------------------------------------------------------------------------------------------------------------------------------------------------------------------------------------------------------------------------------------------------------------------------------------------------------------------------------------------------------------------------------------|------------------------------------------------------------------------------------------------------------------------------------------------------------------|
|                                                                   | “Goddess Demetra (GD)”: social and political movements associated with diet/lifestyle<br>Intensity- weekly                                                                                                                                                                                                                                                                                                                                                                                                                                               |                                                                                                                                                                  |
| Partridge <i>et al</i><br>2016, Australia,<br>N=250               | Behavioural: Health coaching calls, SMS, emails, smartphone application and website.<br>Intensity: 5 × health coaching calls (10-15 mins), 8 × SMS (2 per week), weekly emails, booklet containing diet, PA information<br>Facilitator: dietitian                                                                                                                                                                                                                                                                                                        | Brochure: diet and PA; introductory call (no coaching), 4 × SMS                                                                                                  |
| Rodearmel <i>et al.</i><br>2006, USA, N= 159                      | Diet & PA/mixed: Prescriptive diet and exercise program: walking and cereal consumption targets. Step counters, calculators, cereal provided                                                                                                                                                                                                                                                                                                                                                                                                             | Usual eating and step patterns. Step counters, calculators provided                                                                                              |
| Verweij <i>et al.</i> 2012,<br>The Netherlands<br>N=28 OPs N= 523 | Behavioural: Guideline based care provided by OP’s to employers and employees. Advice at the environmental and individual level<br>Intensity: 5 × counselling sessions (~20-30 mins)<br>Facilitators: OPs with behaviour change counselling                                                                                                                                                                                                                                                                                                              | OPs provided usual care.                                                                                                                                         |
| Walthouwer <i>et al</i><br>2015, The Netherlands,<br>N=1419       | Behavioural: Web-based individually tailored behavioural change program: video or text format<br>Intensity- 6 weekly sessions, 15 mins each                                                                                                                                                                                                                                                                                                                                                                                                              | No intervention                                                                                                                                                  |
| Wing <i>et al</i> 2016<br>USA, N=609                              | Diet & PA/mixed: Prescribed diet and exercise plans.<br>Small changes (SC): deficit of 100 kcal/day, steps increased to 2000/day<br>Large changes (LC): deficit of 500-1000 kcal/d and increasing moderate to vigorous PA to ≥250 mins/week. All participants daily self-weighing with feedback. Intensity: 10 × group sessions, weeks 1-8 weekly, weeks 9-16 monthly. 2× 4-weekly online refresher campaigns, monthly remote weight reporting, quarterly newsletter<br>Facilitator: health science (masters) and behavioural weight management training | 1 group session: weight gain, an overview of interventions.<br>Participants chose an intervention. Quarterly newsletter, monthly personalised feedback on weight |
| Williams <i>et al</i><br>2014, Australia<br>N=54                  | Diet & PA/mixed: late perimenopause.<br>Face to face counselling sessions, individualised weight management booklet. Intensity: 5 sessions x 1 hour.<br>Facilitators: Dietitian, exercise physiologist with motivational interviewing                                                                                                                                                                                                                                                                                                                    | Weight management booklet, baseline anthropometric, biochemistry, dietary and PA results to assist self-monitoring of weight, and tailored health goals          |
| Williams <i>et al</i><br>2019, Australia N=54                     | Diet & PA/mixed: late perimenopause.<br>Face to face counselling sessions, individualised weight management booklet. Intensity: 5 sessions x 1 hour.<br>Facilitators: Dietitian, exercise physiologist with motivational interviewing                                                                                                                                                                                                                                                                                                                    | Weight management booklet, baseline anthropometric, biochemistry, dietary and PA results to assist self-monitoring of weight, and tailored health goals          |

Age in years and BMI of participants are reported as mean ± SD at baseline, unless otherwise stated. C: comparator/ control, F: female, M: male, I: intervention, N: number of participants randomized, SD: standard deviation, SE: standard error, PA: physical activity, ow: overweight, OPs: occupational physician.

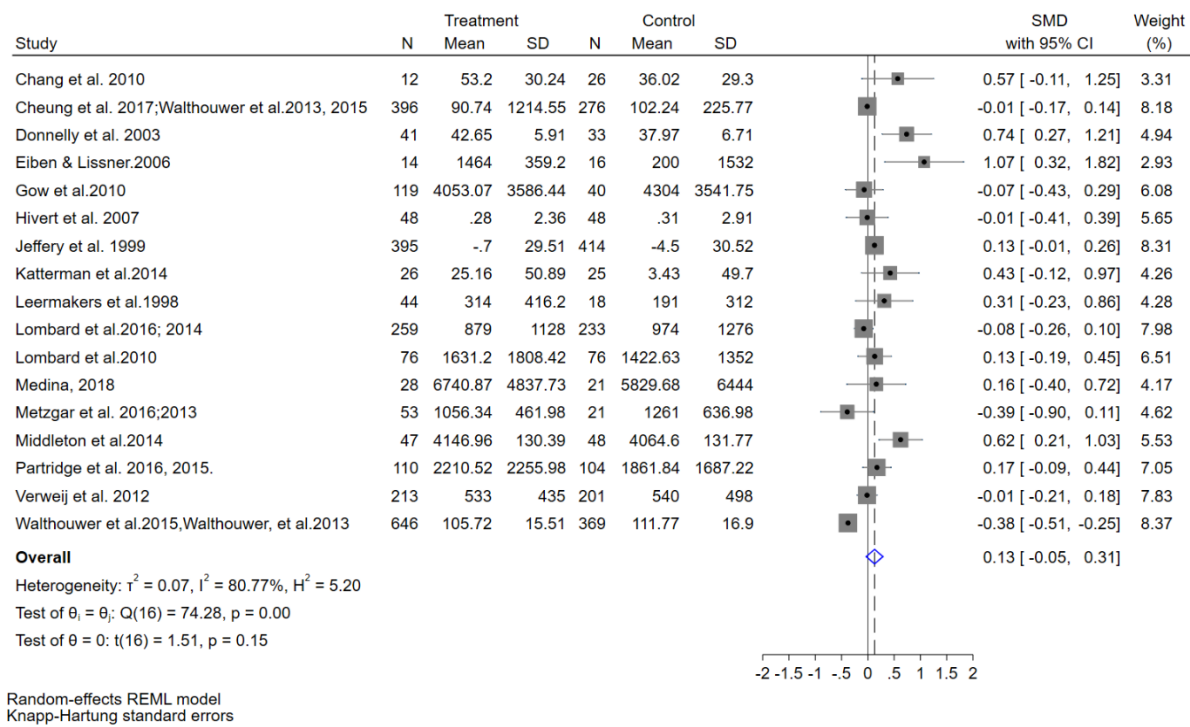

**Figure S2:** Forest plots for physical activity
